# Supplementary material for: Ligand-mediated synthesis of compositionally related cesium lead halide CsPb2X5 nanowires with improved stability
Source: Royal Society of Chemistry journal article supplement (doi:10.1039/c8nr00883c), 2018-01-01
Supplement: c8nr00883c1.pdf [file c8nr00883c1.pdf]

**Supporting Information for**

**Ligand-Mediated Synthesis of Compositionally-Related  
Cesium Lead Halide CsPb<sub>2</sub>X<sub>5</sub> Nanowires with Improved  
Stability**

Longfei Ruan, Jin Lin, Wei Shen\* and Zhengtao Deng\*

Department of Biomedical Engineering, College of Engineering and Applied Sciences, Nanjing  
National Laboratory of Microstructures, Collaborative Innovation Center of Chemistry for Life  
Sciences, Nanjing University, Nanjing, Jiangsu 210093, People's Republic of China

Listing of the contents:

|                                                                                                     |         |
|-----------------------------------------------------------------------------------------------------|---------|
| 1. X-ray diffraction (XRD) patterns of CsPb <sub>2</sub> Br <sub>5</sub> nanowires                  | Page S2 |
| 2. Fine XRD results of CsPb <sub>2</sub> X <sub>5</sub> (X=Cl, Br or I) nanowires                   | Page S3 |
| 3. Fine XRD spectra of the CsPb <sub>2</sub> X <sub>5</sub> (X=Cl, Br or I)                         | Page S4 |
| 4. UV-Vis spectra of CsPb <sub>2</sub> X <sub>5</sub> (X=Cl, Br or I) nanowires with anion exchange | Page S5 |
| 5. Correlations between bandgap and composition                                                     | Page S6 |
| 6. SEM images of CsPb <sub>2</sub> X <sub>5</sub> (X=Cl, Br or I) nanowires with anion exchange     | Page S7 |
| 7. Relative PL intensity of the direct synthesis and anion exchange in humid air                    | Page S8 |

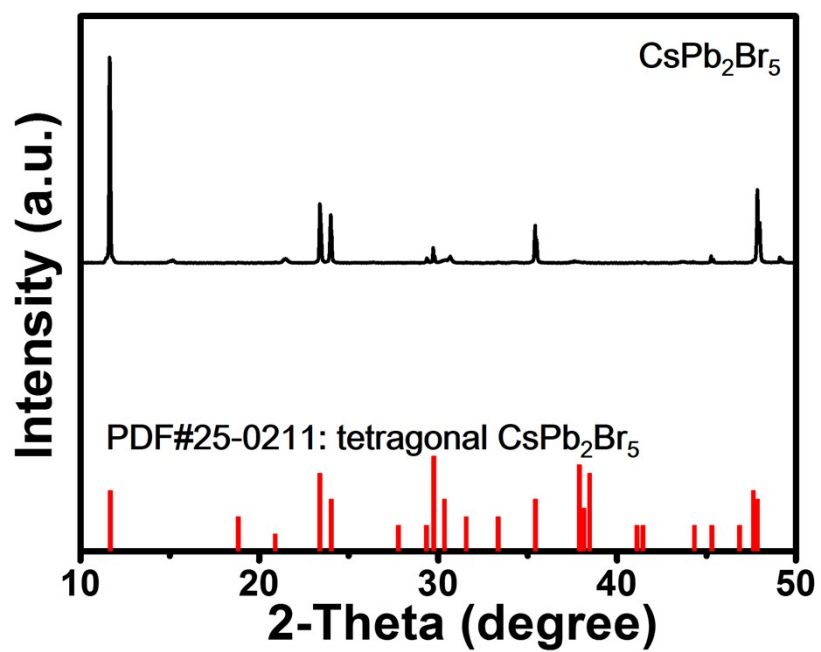

**Figure S1.** X-ray diffraction (XRD) patterns of the CsPb<sub>2</sub>Br<sub>5</sub> nanowires (black line). Stick patterns: Standard PXRD of tetragonal CsPb<sub>2</sub>Br<sub>5</sub> (PDF#25-0211, red line).

**Table.S1** Fine XRD results of CsPb<sub>2</sub>X<sub>5</sub> (X=Cl, Br or I) nanowires with different halide ratio.

(Peak 1 and Peak 2 correspond to {002} and {413} planes of the tetragonal CsPb<sub>2</sub>X<sub>5</sub>)

| Different proportion of halogen | Peak 1    | Peak 2    |
|---------------------------------|-----------|-----------|
| I:Br=7:3                        | 9.9±0.08  | 45.1±0.10 |
| I:Br=2:8                        | 11.3±0.06 | 46.6±0.05 |
| I(Cl):Br=0:10                   | 11.6±0.07 | 47.8±0.07 |
| Cl:Br=3:7                       | 11.8±0.08 | 48.2±0.04 |
| Cl:Br=7:3                       | 12.1±0.11 | 48.7±0.06 |

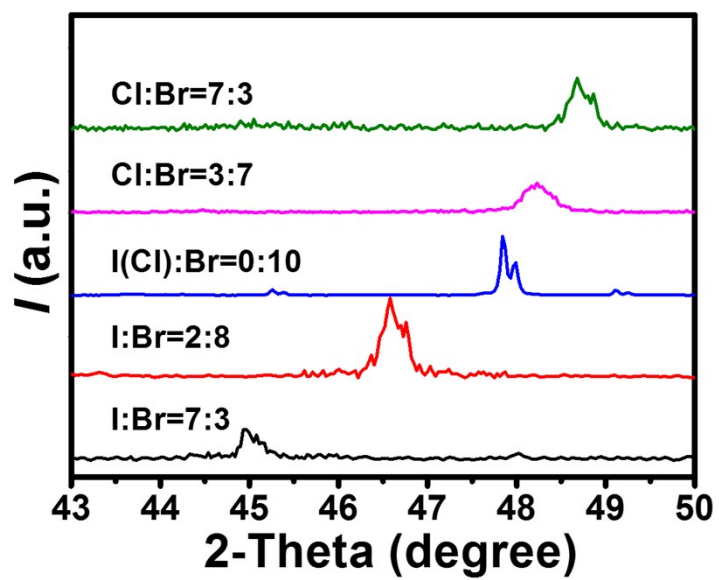

**Figure S2.** Fine XRD spectra in Figure 2A of CsPb<sub>2</sub>X<sub>5</sub> (X=Cl, Br or I) nanocrystals with different halide ratio.

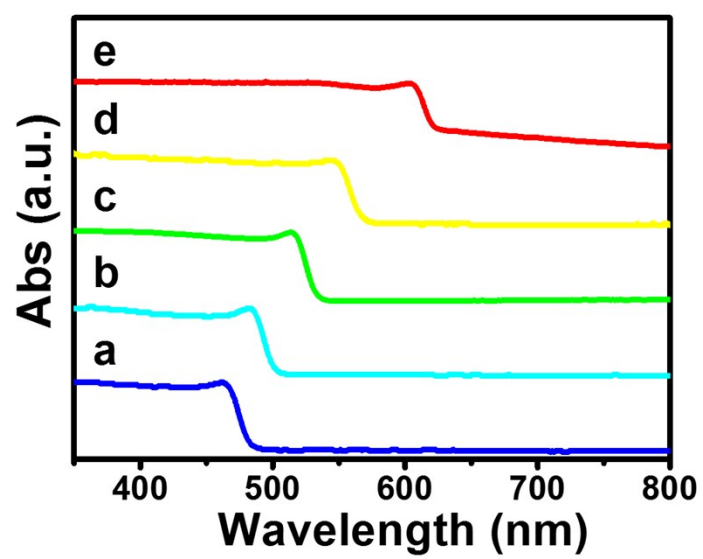

**Figure S3.** UV-Vis spectra of the  $\text{CsPb}_2\text{X}_5$  ( $\text{X}=\text{Cl}$ ,  $\text{Br}$  or  $\text{I}$ ) nanowires with anion exchange.

**Table S2.** Correlations between bandgap and composition.

| Sample | Bandgap (eV) | x   | Halogen ratio    |
|--------|--------------|-----|------------------|
| a      | 2.67         | 3.5 | Cl/Br = 7/3      |
| b      | 2.56         | 1.5 | Cl/Br = 3/7      |
| c      | 2.36         | 0   | Cl or I/Br = 0/1 |
| d      | 2.19         | 1.1 | I/Br = 2.2/7.8   |
| e      | 2.00         | 3.5 | I/Br = 7/3       |

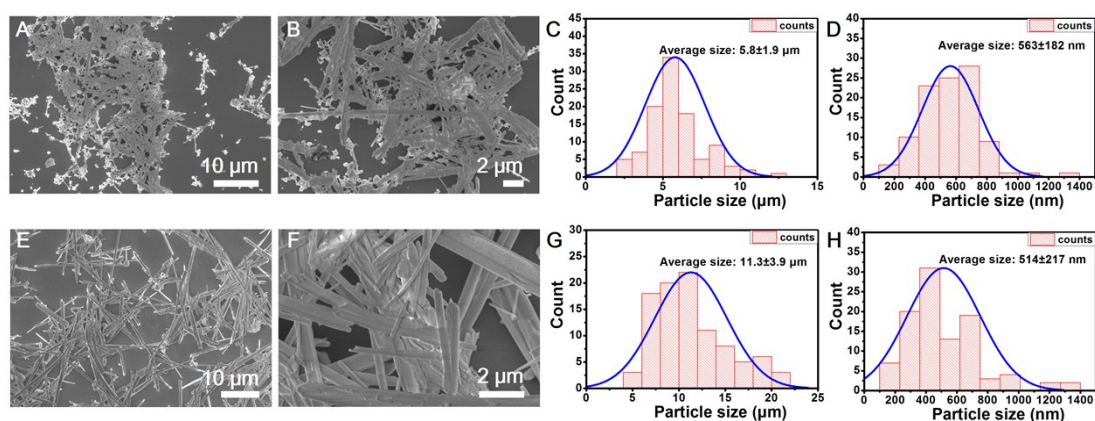

**Figure S4.** (A) and (B) Scanning electron microscopy (SEM) images of the blue (465 nm) nanowires with anion exchange; (C) and (D) Statistical distribution histogram of the blue (465 nm) nanowires with anion exchange (Length: 5.8 μm, width: 563 nm); (E) and (F) Scanning electron microscopy (SEM) images of the red (620 nm) nanowires with anion exchange; (G) and (H) Statistical distribution histogram of the red (620 nm) nanowires with anion exchange (Length: 11.3 μm, width: 514 nm).

**Table S3.** Relative PL intensity of the direct synthesis and anion exchange in humid air (60% RH, 25 °C).

| Sample                                                                                          | Percentage |
|-------------------------------------------------------------------------------------------------|------------|
| CsPb <sub>2</sub> (Cl <sub>0.7</sub> /Br <sub>0.3</sub> ) <sub>5</sub> -Direct synthesis-465 nm | 114 %      |
| CsPb <sub>2</sub> (I <sub>0.7</sub> /Br <sub>0.3</sub> ) <sub>5</sub> -Direct synthesis-621 nm  | 106 %      |
| CsPb <sub>2</sub> Cl <sub>x</sub> Br <sub>5-x</sub> -Anion exchange-465 nm                      | 29 %       |
| CsPb <sub>2</sub> I <sub>x</sub> Br <sub>5-x</sub> -Anion exchange-621 nm                       | 40 %       |
